# Supplementary material for: Applications and methods utilizing the Simple Semantic Web Architecture and Protocol (SSWAP) for bioinformatics resource discovery and disparate data and service integration
Source: Springer Nature journal article supplement (doi:10.1186/1756-0381-3-3), 2010-06-04

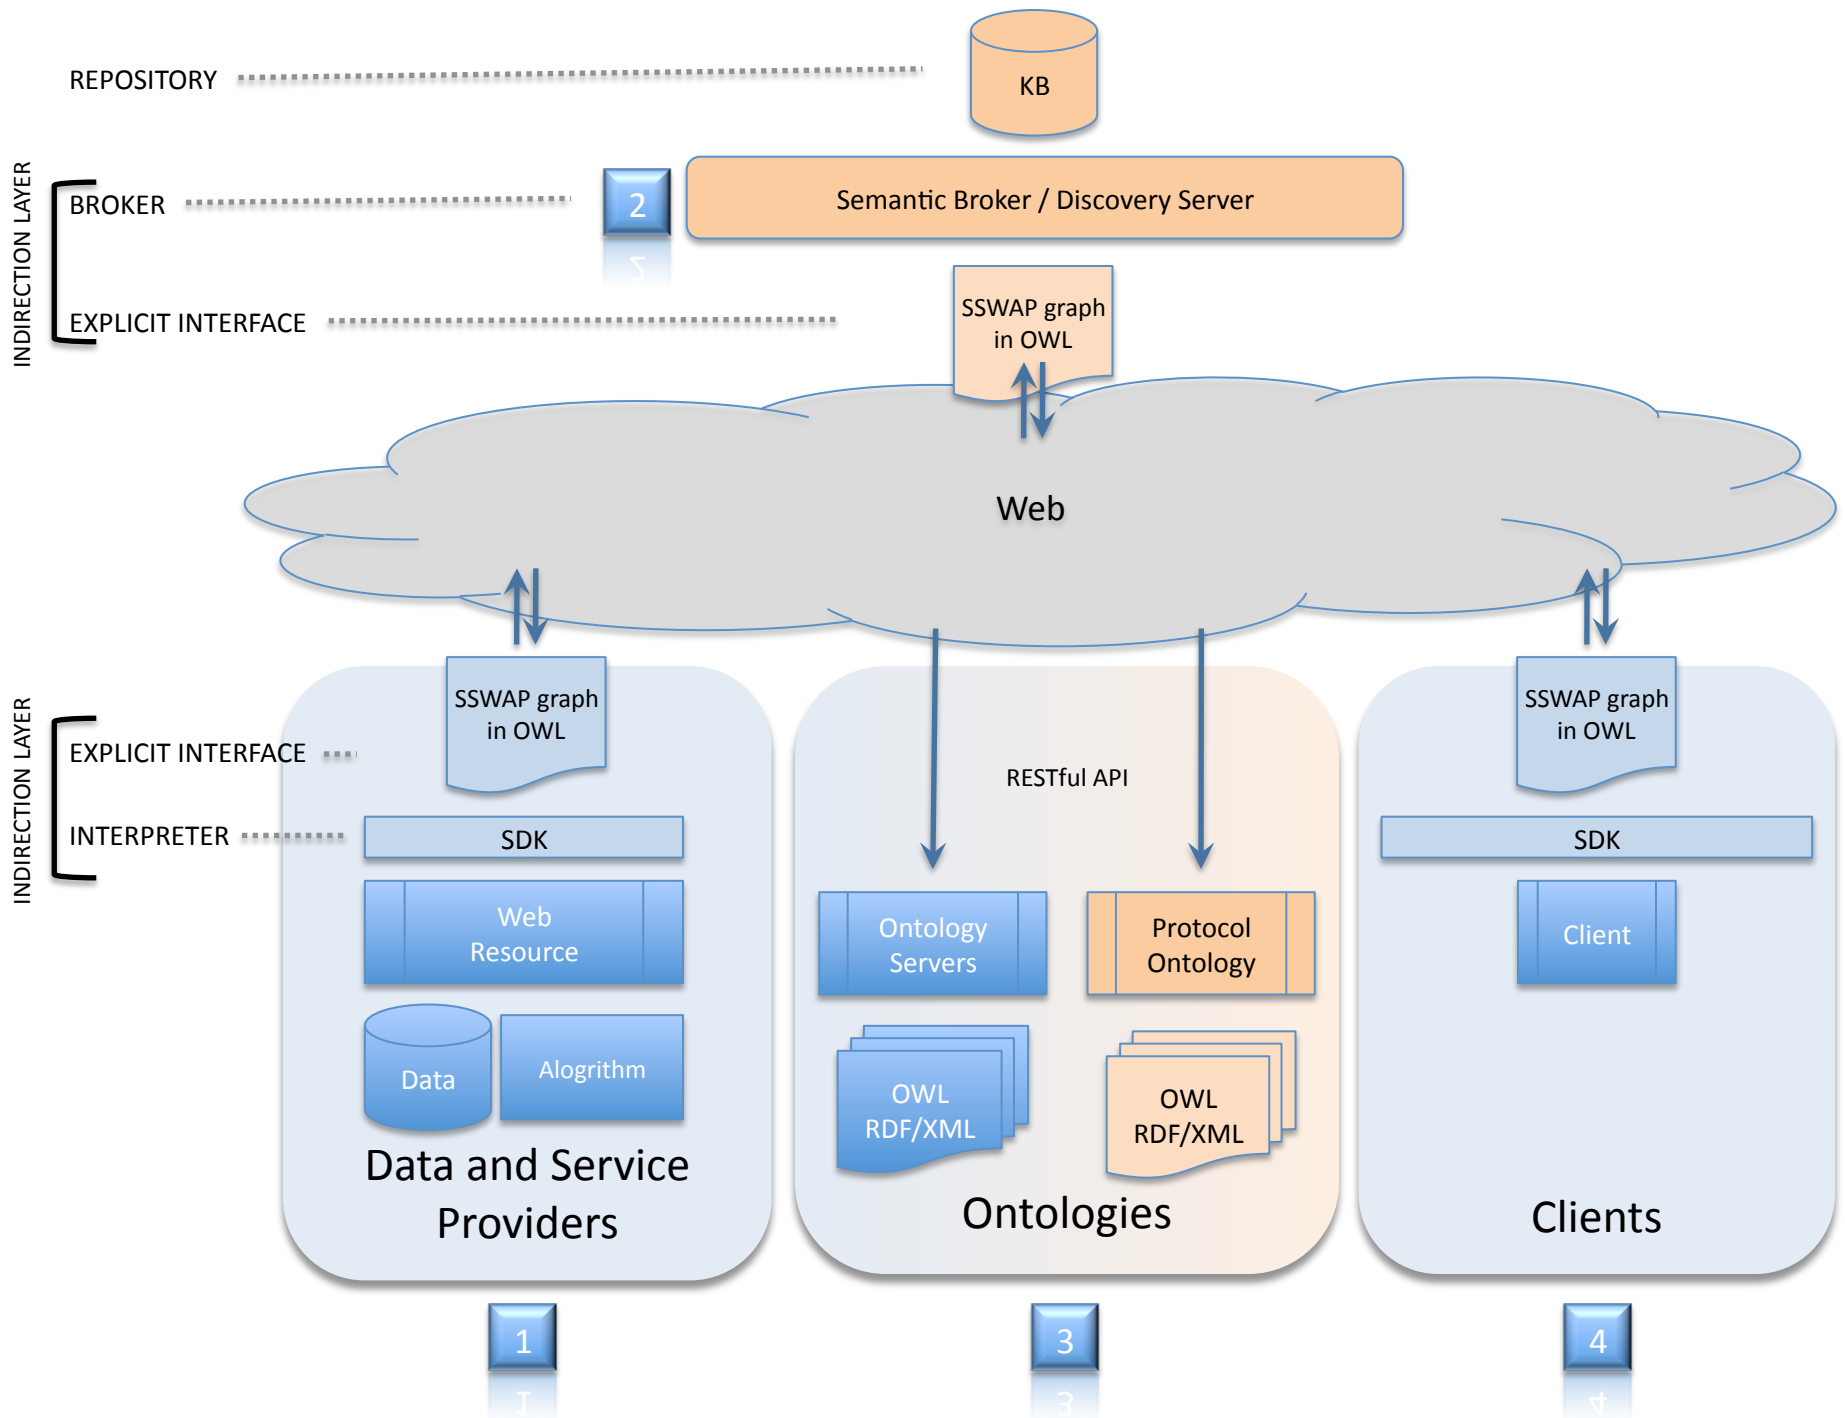

Supplement: 13040_2009_24_MOESM5_ESM.pdf [file 13040_2009_24_MOESM5_ESM.pdf]
